# Supplementary material for: The lncRNA lincNMR regulates nucleotide metabolism via a YBX1 - RRM2 axis in cancer
Source: PubMed Central journal article supplement (PMC7316977; doi:10.1038/s41467-020-17007-9), 2020-06-25
Supplement: 41467_2020_17007_MOESM2_ESM.pdf [file 41467_2020_17007_MOESM2_ESM.pdf]

## **Description of Additional Supplementary Files**

File Name: Supplementary Data 1

Description: List of lncRNAs screened for expression in nine liver cancer cell lines

File Name: Supplementary Data 2

Description: List of candidates identified in lincNMR RAP-MS

File Name: Supplementary Data 3

Description: Sequences of all siPOOLS used in this study

File Name: Supplementary Data 4

Description: Sequences of all RT-qPCR primers used in this study

File Name: Supplementary Data 5

Description: List of antibodies and dilutions used

File Name: Supplementary Data 6

Description: List of RACE primers used in this study

File Name: Supplementary Data 7

Description: List of RAP-MS probes used for lincNMR pulldown

File Name: Supplementary Data 8

Description: List of primers used for YBX1 ChIP

File Name: Supplementary Data 9

Description: Sequences of primers used for luciferase assay constructs

File Name: Supplementary Data 10

Description: Sequences of lincNMR cloning and mutagenesis primers used for generating YBX1 binding site mutations
